# Supplementary material
Source: ML conference proceedings conference paper supplement (https://openaccess.thecvf.com/content/ICCV_2019/html/Lu_Sampling_Wisely_Deep_ICCV_2019_paper.html)
Supplement: Supplementary file 1 [file Lu_Sampling_Wisely_Deep_ICCV_2019_supplemental.pdf]

# Sampling Wisely: Deep Image Embedding by Top- $k$ Precision Optimization

## Supplementary Materials

Jing Lu<sup>1\*</sup> Chaofan Xu<sup>2,3\*</sup> Wei Zhang<sup>2</sup> Lingyu Duan<sup>4</sup> Tao Mei<sup>2</sup>

<sup>1</sup>Business Growth BU, JD <sup>2</sup> JD AI Research <sup>3</sup>Harbin Institute of Technology <sup>4</sup>Peking University  
lvjing12@jd.com, xuchaofan1994@126.com, wzhang.cu@gmail.com, lingyu@pku.edu.cn, tmei@live.com

### 1. Proof for Theorems

This section provides the proofs for the 4 theorems.

**Theorem 1. Upper bounding:** For any  $n_+ < k$  and  $\mathbf{s}$ ,

$$\ell_k(\mathbf{s}, \mathbf{y}) \geq \gamma \ell_{\text{Prec}@k}(\mathbf{s}, \mathbf{y}) - \gamma(k - n_+) \quad (1)$$

*Proof.* We rewrite the loss function by adding the scores in set  $\mathcal{K} \setminus \mathcal{N}$  to both of the two terms.

$$\begin{aligned} \ell_k(\mathbf{s}, \mathbf{y}) &= \sum_{z_i \in \mathcal{N}} \hat{s}_i - \sum_{z_i \in \mathcal{P}} \hat{s}_i \\ &= \sum_{z_i \in \mathcal{K}} \hat{s}_i - \sum_{z_i \in \mathcal{P} \cup \mathcal{K} \setminus \mathcal{N}} \hat{s}_i \end{aligned} \quad (2)$$

Note that  $\mathcal{K}$  was defined as the top  $k$  ranked according to  $\hat{s}_i$ . We also define set  $\mathcal{K}'$  as the top  $k$  ranked according to  $s_i$ , i.e.  $\mathcal{K}' = \{z_i \in \mathcal{C} : s_i \geq s_{[k]}\}$ . So, the first term,

$$\sum_{z_i \in \mathcal{K}} \hat{s}_i \geq \sum_{z_i \in \mathcal{K}'} \hat{s}_i = \gamma \ell_{\text{Prec}@k}(\mathbf{s}, \mathbf{y}) + \sum_{z_i \in \mathcal{K}'} s_i \quad (3)$$

We further consider the second term. In set  $\mathcal{P} \cup \mathcal{K} \setminus \mathcal{N}$  there are  $k$  images including  $n_+$  positive images. So

$$\sum_{z_i \in \mathcal{P} \cup \mathcal{K} \setminus \mathcal{N}} \hat{s}_i = \gamma(k - n_+) + \sum_{z_i \in \mathcal{P} \cup \mathcal{K} \setminus \mathcal{N}} s_i \quad (4)$$

By definition  $\sum_{z_i \in \mathcal{K}'} s_i$  is the maximum for the sum of  $s_i$  over  $k$  images and  $|\mathcal{P} \cup \mathcal{K} \setminus \mathcal{N}| = k$  so,

$$\sum_{z_i \in \mathcal{K}'} s_i \geq \sum_{z_i \in \mathcal{P} \cup \mathcal{K} \setminus \mathcal{N}} s_i \quad (5)$$

Combining the three formulas above concludes this proof.  $\square$

**Theorem 2. Consistency:** For any  $n_+ < k$ , when there is a large margin  $\gamma$  between positive images and negative images that should be ranked out of  $\mathcal{K}$  (the  $k - n_+ + 1$ -th

\*Equal Contribution

ranked negative image), i.e.  $s_{[n_+]}^+ - s_{[k-n_++1]}^- \geq \gamma$ , we have  $\ell_k(\mathbf{s}, \mathbf{y}) = \ell_{\text{Prec}@k}(\mathbf{s}, \mathbf{y}) - (k - n_+) = 0$ . Here  $\mathbf{s}^+ \in \mathbb{R}^{n_+}$  and  $\mathbf{s}^- \in \mathbb{R}^{n-n_+}$  are two sub-vectors of  $\mathbf{s}$  containing the similarity scores of positive and negative images.

*Proof.* If  $\mathcal{K}$  contains all  $n_+$  positive images,  $\mathcal{P} = \mathcal{N} = \emptyset$ , obviously,  $\ell_k(\mathbf{s}, \mathbf{y}) = 0$ .

We now assume  $\mathcal{K}$  contains  $n'_+ < n_+$  positive images,  $\mathcal{P} = \mathcal{N} \neq \emptyset$ . We have,

$$\begin{aligned} \ell_k(\mathbf{s}, \mathbf{y}) &= \sum_{z_i \in \mathcal{K}} \hat{s}_i - \sum_{z_i \in \mathcal{P} \cup \mathcal{K} \setminus \mathcal{N}} \hat{s}_i \\ &= \gamma(k - n'_+) + \sum_{z_i \in \mathcal{K}} s_i - \sum_{z_i \in \mathcal{P} \cup \mathcal{K} \setminus \mathcal{N}} \hat{s}_i \\ &= \gamma(k - n'_+) + \sum_{z_i \in \mathcal{K} \setminus \mathcal{N}} s_i + \sum_{z_i \in \mathcal{N}} s_i - \sum_{z_i \in \mathcal{P} \cup \mathcal{K} \setminus \mathcal{N}} \hat{s}_i \end{aligned} \quad (6)$$

$|\mathcal{N}| = n_+ - n'_+$ . Based on the definition of  $\mathcal{N}$  and the large margin condition,

$$\sum_{z_i \in \mathcal{N}} s_i \leq \gamma(n'_+ - n_+) + \sum_{z_i \in \mathcal{P}} s_i \quad (7)$$

So

$$\ell_k(\mathbf{s}, \mathbf{y}) \leq \gamma(k - n_+) + \sum_{z_i \in \mathcal{P} \cup \mathcal{K} \setminus \mathcal{N}} s_i - \hat{s}_i \quad (8)$$

The set  $\mathcal{P} \cup \mathcal{K} \setminus \mathcal{N}$  contains  $k - n_+$  negative images. So  $\ell_k(\mathbf{s}, \mathbf{y}) \leq 0$ . Since we already known  $\ell_k(\mathbf{s}, \mathbf{y}) \geq 0$  from Theorem 1, we conclude  $\ell_k(\mathbf{s}, \mathbf{y}) = 0$ .  $\square$

We now prove the two properties of Case 2 in the following 2 Theorems. <sup>1</sup>

**Theorem 3. Upper bounding:** For any  $n_+ > k$ , and  $\mathbf{s}$ ,

$$\ell_k(\mathbf{s}, \mathbf{y}) \geq \gamma \ell_{\text{Prec}@k}(\mathbf{s}, \mathbf{y}) \quad (9)$$

<sup>1</sup>A special case of was proven in [13]

*Proof.* The set  $\mathcal{P} \cup \mathcal{K} \setminus \mathcal{N}$  contains only  $k$  positive images.

$$\sum_{z_i \in \mathcal{P} \cup \mathcal{K} \setminus \mathcal{N}} \hat{s}_i = \sum_{z_i \in \mathcal{P} \cup \mathcal{K} \setminus \mathcal{N}} s_i \quad (10)$$

which is different from Eq 4 in Theorem 1. Other steps of this proof is straight forward, so we omit them for concise.  $\square$

**Theorem 4. Consistency:** For  $n_+ > k$ , when there is a large margin  $\gamma$  between the top  $k$  positive and the top negative images, i.e.  $s_{[k]}^+ - s_{[1]}^- \geq \gamma$ , we have  $\ell_{\text{prec}@k} = \ell_k = 0$ .

*Proof.* We also assumes  $n'_+ < n_+$ . So

$$\ell_k(\mathbf{s}, \mathbf{y}) = \sum_{z_i \in \mathcal{N}} \hat{s}_i - \sum_{z_i \in \mathcal{P}} \hat{s}_i = \gamma |\mathcal{N}| + \sum_{z_i \in \mathcal{N}} s_i - \sum_{z_i \in \mathcal{P}} s_i \quad (11)$$

Given the large margin condition,  $\sum_{z_i \in \mathcal{P}} s_i - \sum_{z_i \in \mathcal{N}} s_i \geq \gamma |\mathcal{N}|$ , We have  $\ell_k(\mathbf{s}, \mathbf{y}) \leq 0$ . Combining with the above theorem  $\ell_k(\mathbf{s}, \mathbf{y}) \geq 0$ , we have  $\ell_k(\mathbf{s}, \mathbf{y}) = 0$ .  $\square$

|                       | P/R@1        | P@3          | P@5          | P@10         | R@3          | R@5          | R@10         | NMI          | mAP          | F1           |
|-----------------------|--------------|--------------|--------------|--------------|--------------|--------------|--------------|--------------|--------------|--------------|
| <b>CUB-200-2011</b>   |              |              |              |              |              |              |              |              |              |              |
| Uniform Triplet       | 44.53        | 40.64        | 38.83        | 35.45        | 64.84        | 73.80        | 83.12        | 54.96        | 20.75        | 19.42        |
| Hard Mining Triplet   | 53.88        | 50.01        | 47.64        | 43.92        | 72.64        | 79.74        | 87.51        | 62.17        | 27.14        | 30.02        |
| Semi Hard Triplet     | 51.87        | 48.62        | 46.58        | 43.18        | 71.44        | 79.03        | 86.75        | 61.14        | 27.16        | 27.01        |
| Distance Weighted     | 50.49        | 46.70        | 44.18        | 40.64        | 70.44        | 77.94        | 86.44        | 60.41        | 24.59        | 27.87        |
| Contrastive Loss      | 39.69        | 36.19        | 34.01        | 31.01        | 59.06        | 68.11        | 80.17        | 53.09        | 18.33        | 20.48        |
| Lifted Struct Loss    | 45.19        | 41.37        | 39.10        | 35.94        | 66.00        | 74.11        | 83.59        | 58.07        | 21.86        | 23.58        |
| N-Pair Loss           | 50.61        | 47.75        | 45.22        | 41.56        | 69.68        | 76.86        | 85.62        | 59.56        | 25.79        | 25.97        |
| Angular Loss          | 51.98        | 47.58        | 45.14        | 41.03        | 71.42        | 78.93        | 86.80        | 60.99        | 24.32        | 27.83        |
| Proxy NCA Loss        | 52.70        | 48.79        | 46.34        | 42.42        | 71.48        | 78.54        | 86.14        | 61.64        | 26.13        | 28.52        |
| Ours $\ell_k$         | <b>54.12</b> | <b>50.17</b> | <b>47.90</b> | <b>44.43</b> | <b>72.69</b> | <b>80.30</b> | <b>87.98</b> | <b>63.53</b> | <b>27.79</b> | <b>31.70</b> |
| <b>Stanford Cars</b>  |              |              |              |              |              |              |              |              |              |              |
| Uniform Triplet       | 52.97        | 45.46        | 41.16        | 34.61        | 70.51        | 77.17        | 85.02        | 44.73        | 12.97        | 12.00        |
| Hard Mining Triplet   | 69.12        | 62.05        | 57.74        | 51.00        | 83.20        | 87.76        | 92.19        | 57.00        | 22.38        | 25.29        |
| Semi Hard Triplet     | 62.35        | 56.00        | 52.19        | 46.35        | 77.92        | 83.68        | 89.19        | 54.19        | 21.87        | 22.32        |
| Distance Weighted     | 59.02        | 52.75        | 48.80        | 42.95        | 75.55        | 81.29        | 87.52        | 52.36        | 19.98        | 20.42        |
| Contrastive Loss      | 38.00        | 30.71        | 27.19        | 22.39        | 54.32        | 62.61        | 73.23        | 34.93        | 7.49         | 7.00         |
| Lifted Struct Loss    | 56.56        | 49.04        | 44.71        | 37.97        | 73.31        | 79.34        | 86.16        | 46.27        | 14.47        | 13.25        |
| N-Pair Loss           | 61.75        | 53.70        | 49.18        | 42.27        | 77.01        | 82.60        | 88.53        | 49.47        | 16.56        | 15.63        |
| Angular Loss          | 71.44        | 64.73        | 60.70        | 53.57        | 84.28        | 88.65        | 92.81        | 57.40        | 23.48        | 25.28        |
| Proxy NCA Loss        | 72.39        | 66.14        | 62.05        | 54.98        | 85.46        | 89.71        | 93.40        | 59.00        | 24.18        | 27.21        |
| Ours $\ell_k$         | <b>73.34</b> | <b>67.37</b> | <b>63.34</b> | <b>56.17</b> | <b>86.29</b> | <b>90.38</b> | <b>94.12</b> | <b>59.64</b> | <b>24.79</b> | <b>27.73</b> |
| <b>Online Product</b> |              |              |              |              |              |              |              |              |              |              |
| Uniform Triplet t     | 61.82        | 45.97        | 36.30        | 23.19        | 70.65        | 74.08        | 78.30        | 27.36        | 44.35        | 24.27        |
| Hard Mining Triplet   | 72.94        | 57.65        | 46.87        | 30.51        | 80.62        | 83.58        | 86.97        | 36.54        | 37.45        | 33.79        |
| Semi Hard Triplet     | 67.46        | 51.88        | 41.58        | 26.81        | 75.68        | 79.02        | 83.11        | 32.05        | 49.52        | 27.85        |
| Distance Weighted     | 67.21        | 51.69        | 41.55        | 26.88        | 75.50        | 78.74        | 82.56        | 27.65        | 49.55        | 25.50        |
| Contrastive Loss      | 58.14        | 41.97        | 32.56        | 20.52        | 66.71        | 70.33        | 74.83        | 26.98        | 41.14        | 25.63        |
| Lifted Struct Loss    | 64.45        | 48.60        | 38.63        | 24.73        | 72.89        | 76.31        | 80.34        | 37.84        | 46.72        | 33.52        |
| N-Pair Loss           | 65.51        | 49.76        | 39.70        | 25.51        | 73.84        | 77.29        | 81.39        | 35.86        | 47.74        | 31.09        |
| Angular Loss          | 68.43        | 52.66        | 42.33        | 27.37        | 76.66        | 79.79        | 83.61        | 30.04        | 50.43        | 27.77        |
| Proxy NCA Loss        | 67.21        | 51.50        | 41.25        | 26.26        | 75.43        | 78.73        | 82.61        | 36.37        | 49.32        | 31.90        |
| Ours $\ell_k$         | <b>74.95</b> | <b>59.90</b> | <b>48.89</b> | <b>31.89</b> | <b>82.40</b> | <b>85.24</b> | <b>88.45</b> | <b>38.03</b> | <b>52.34</b> | <b>35.27</b> |

Table 1. Comparison with state-of-the-art sampling methods and loss functions on three benchmark datasets. The network backbone is Inception with batch normalization layer. ‘‘P’’ is for precision and ‘‘R’’ is for Recall. Note that NMI and F1 in Online Product Dataset are computed by 12 super categories for time efficiency.

| Backbone  | Uniform | Hard  | Semi-hard | Distance | Contrastive | Lifted | Npair | Angular | Proxy | Ours         |
|-----------|---------|-------|-----------|----------|-------------|--------|-------|---------|-------|--------------|
| Inception | 88.20   | 89.53 | 89.49     | 89.57    | 87.21       | 88.69  | 88.94 | 89.77   | 86.91 | <b>90.07</b> |
| Dense201  | 87.89   | 90.95 | 90.98     | 90.23    | 87.19       | 88.76  | 89.48 | 91.03   | 89.54 | <b>91.94</b> |

Table 2. In our previous tables on Online Product, we reported the NMI and F1 on 12 super classes for time efficiency. For easy comparison with that in literature, we also report the NMI for 11k fine-grained classes.

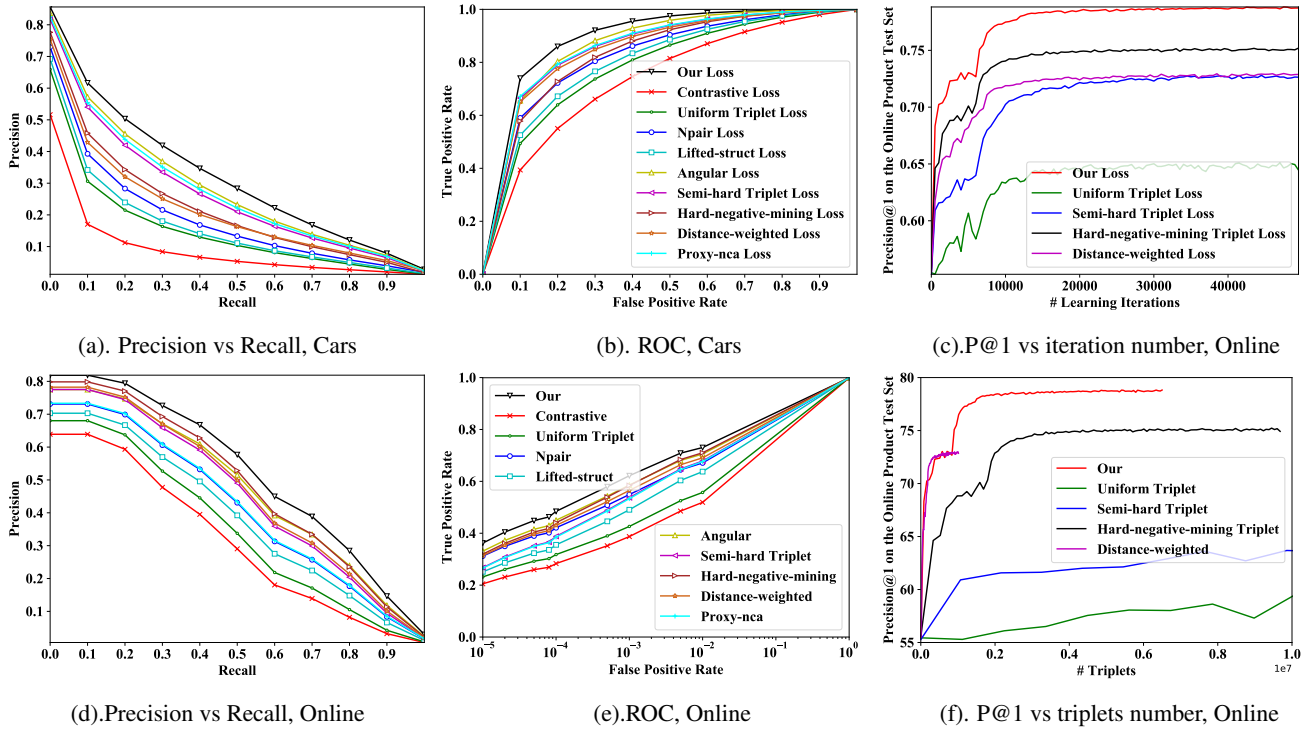

Figure 1. Precision vs Recall curve, ROC curve on Cars and Online Product dataset (a,b,d,e, shared legend). The top-1 precision on test data along the training process of Online Product dataset. (c, f, shared legend). Our algorithm outperforms all baselines. Other results in our main file. The steps in performance gain in figure (c) is due to the decrease in learning rate.

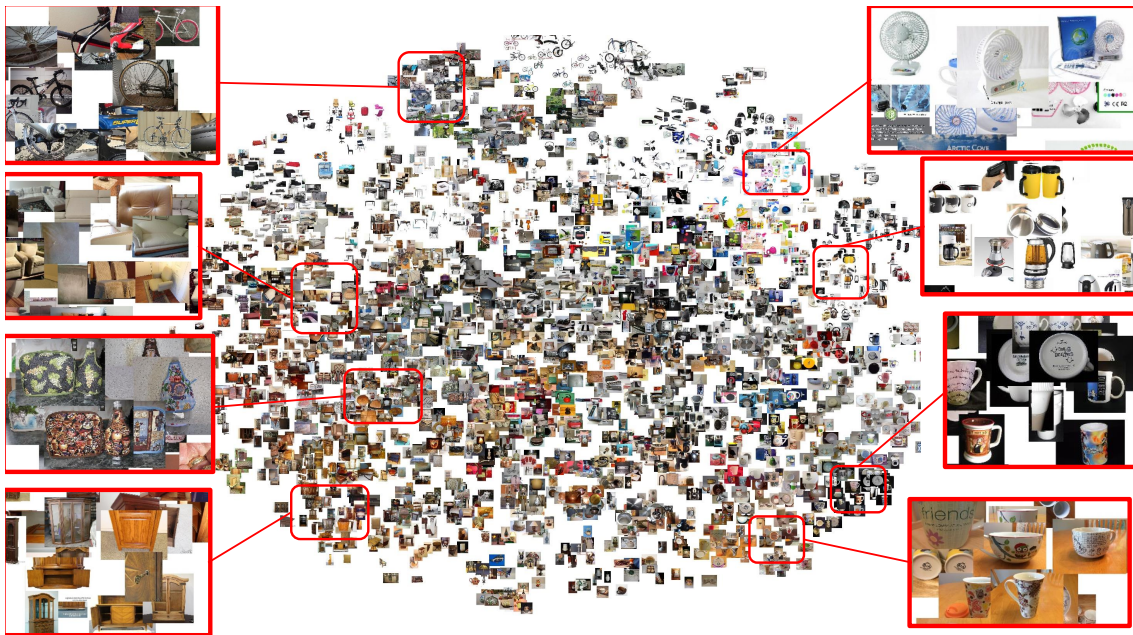

Figure 2. Barnes-Hut t-SNE visualization of our embedding on the test split of Online Product dataset. The embedding generated by the proposed algorithm put similar images in clusters. Best viewed on a monitor zoomed in.
